# Supplementary material for: Lipoteichoic Acid from Staphylococcus aureus Activates the Complement System via C3 Induction and CD55 Inhibition
Source: MDPI journal article supplement (doi:10.3390/microorganisms9061135), 2021-05-24
Supplement: s1 [file s1]

Supplement Table 1. Primer set used in the study.

| Gene | Primer  | Sequence (5'→3')      |
|------|---------|-----------------------|
| C1qA | Forward | AACATCAAGGACCAGCCGAG  |
|      | Reverse | ACCGTGTCGAAGATGACCAC  |
| C2   | Forward | CACTGTGCATCAGGGAGACCT |
|      | Reverse | CCCCATGACCAAAGCGGAA   |
| C3   | Forward | ACCAGCAGACCGTAACCATC  |
|      | Reverse | GCAGCCTTGACTTCCACTTC  |
| C4A  | Forward | CCGTCTGTCTGTCTGCTACC  |
|      | Reverse | CTTTCACTACCTGTCCTCGGG |
| C4B  | Forward | CAAGACAGAGCAGTGGAGCA  |
|      | Reverse | ACAACCAAGCCGCATAGGAA  |
| C5   | Forward | TGTCGTCGCAAGCCAGCTCC  |
|      | Reverse | TGCCAATGCCTTGAATTTCC  |
| C9   | Forward | ATTGTGAAAGTGAGCCCCGT  |
|      | Reverse | ATCCCATAGCCTGCTGTTCG  |
| CD46 | Forward | GTGAGGAGCCACCAACATTT  |
|      | Reverse | GCGGTCATCTGAGACAGGT   |

|        |         |                        |
|--------|---------|------------------------|
| CD55   | Forward | CAGCACCACCACAAATTGAC   |
|        | Reverse | CTGAACTGTTGGTGGGACCT   |
| CD59   | Forward | CCGCTTGAGGGAAAATGAG    |
|        | Reverse | CAGAAATGGAGTCACCAGCA   |
| TLR2   | Forward | TCCTGCTAAGAGACTCCTCTGT |
|        | Reverse | TGGGGAGTGCCCCAAATACT   |
| MyD88  | Forward | TCGACTGAAGTTGTGTGTGT   |
|        | Reverse | AATCATCAGAGACAACCACC   |
| IRAK1  | Forward | ATCTACAAGAAGCACCTGGA   |
|        | Reverse | TCTCTAGCCTCTCGTACACC   |
| IRAK2  | Forward | GGAGATCATCCACAGCAACG   |
|        | Reverse | GCCTGTACCCTCAGAAAGCC   |
| IRAK4  | Forward | AATGATGCTGATTCCACTTC   |
|        | Reverse | GCTGGTGAACCTTCTTAATG   |
| IRAK-M | Forward | TTGGTCCTGGGCACAGAAAA   |
|        | Reverse | TCGAATGTGCCAAGGGAGTG   |
| TRAF6  | Forward | AAGAGAACACCCAGTCACAC   |
|        | Reverse | GTCTTGTCTTACAAGGCGAC   |

|       |         |                      |
|-------|---------|----------------------|
| GAPDH | Forward | AAGGTCGGAGTCAACGGATT |
|       | Reverse | GCAGTGAGGGTCTCTCTCCT |
